# Supplementary material
Source: PubMed Central journal article supplement (PMC4802974)

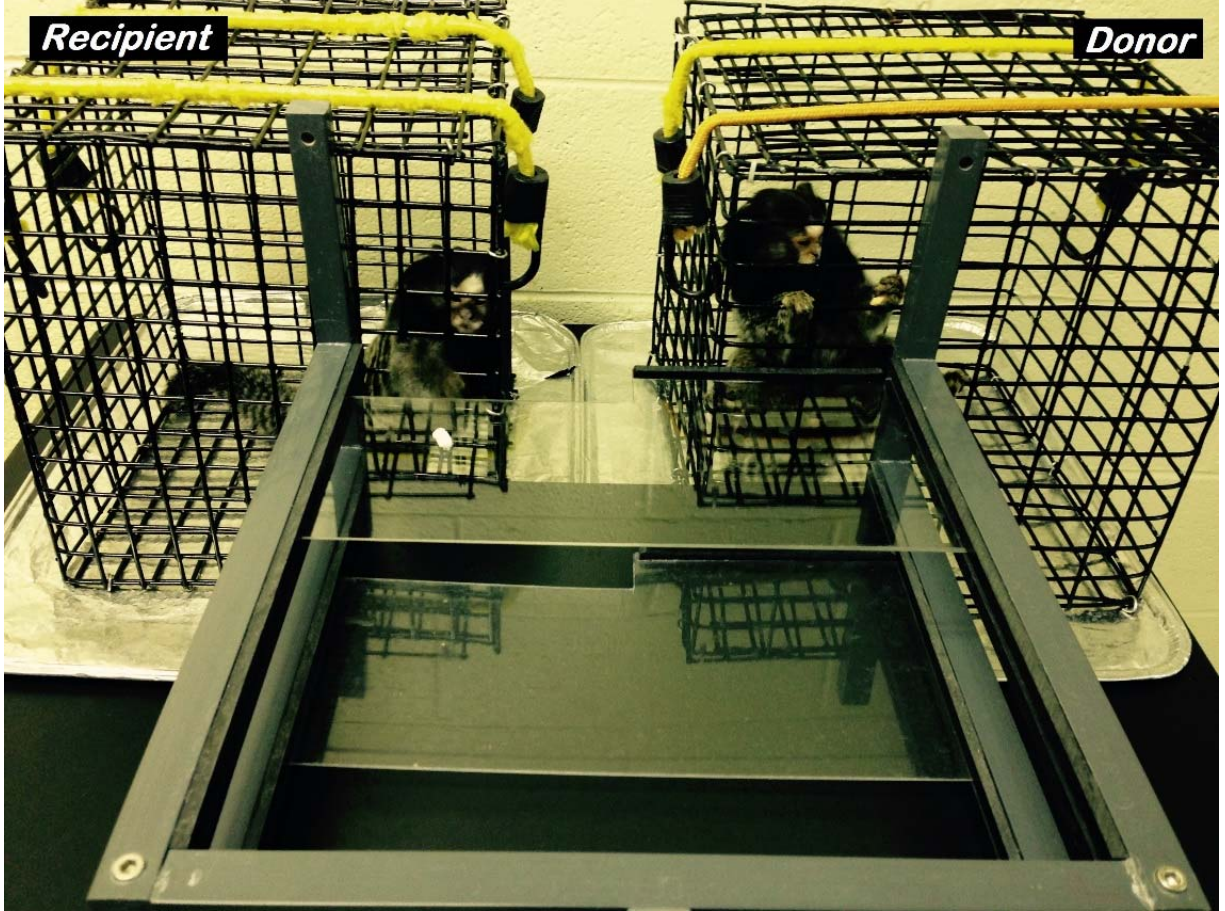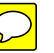

~~A.~~ **Quantitative Inequity**

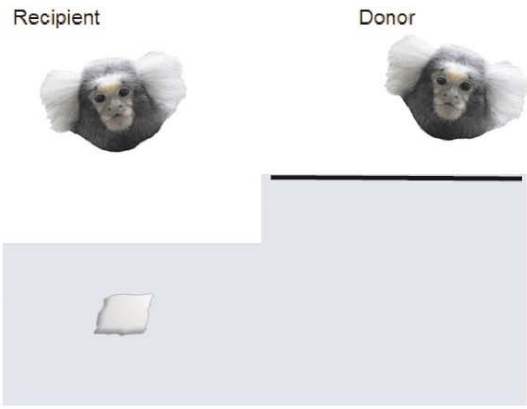

**Null**

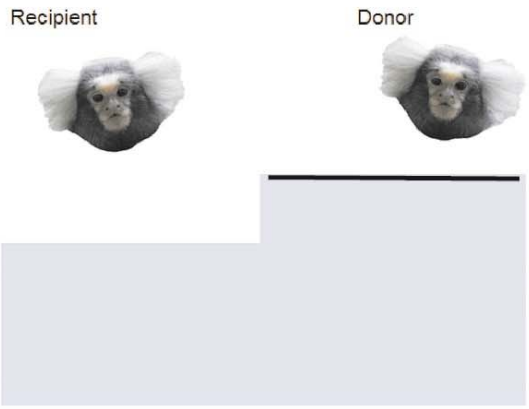

vs.)

~~B.~~ **Qualitative Inequity**

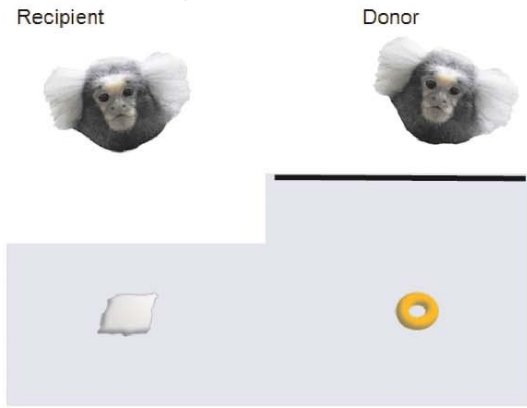

**Equity**

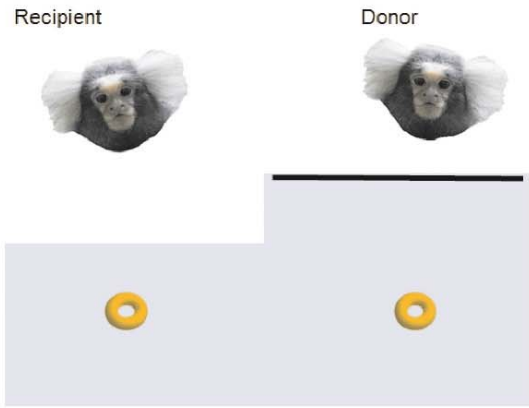

vs.)

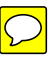

~~C.~~ **Qualitative Inequity**

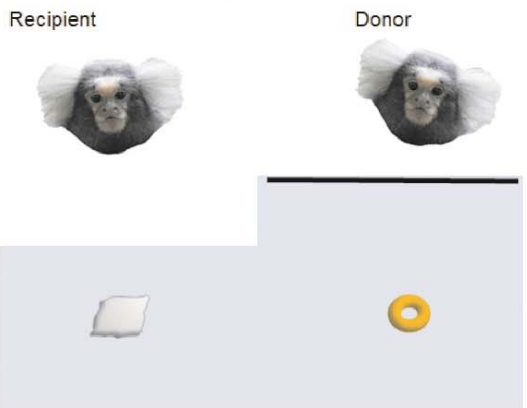

**Selfish**

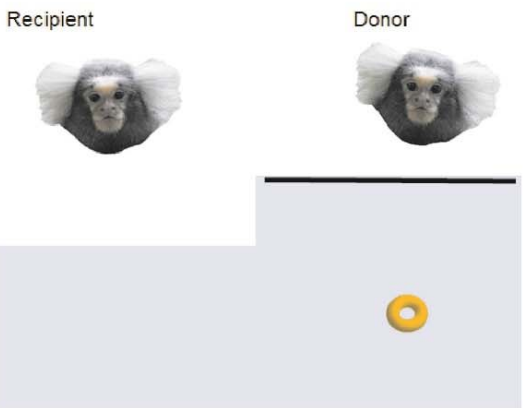

vs.)

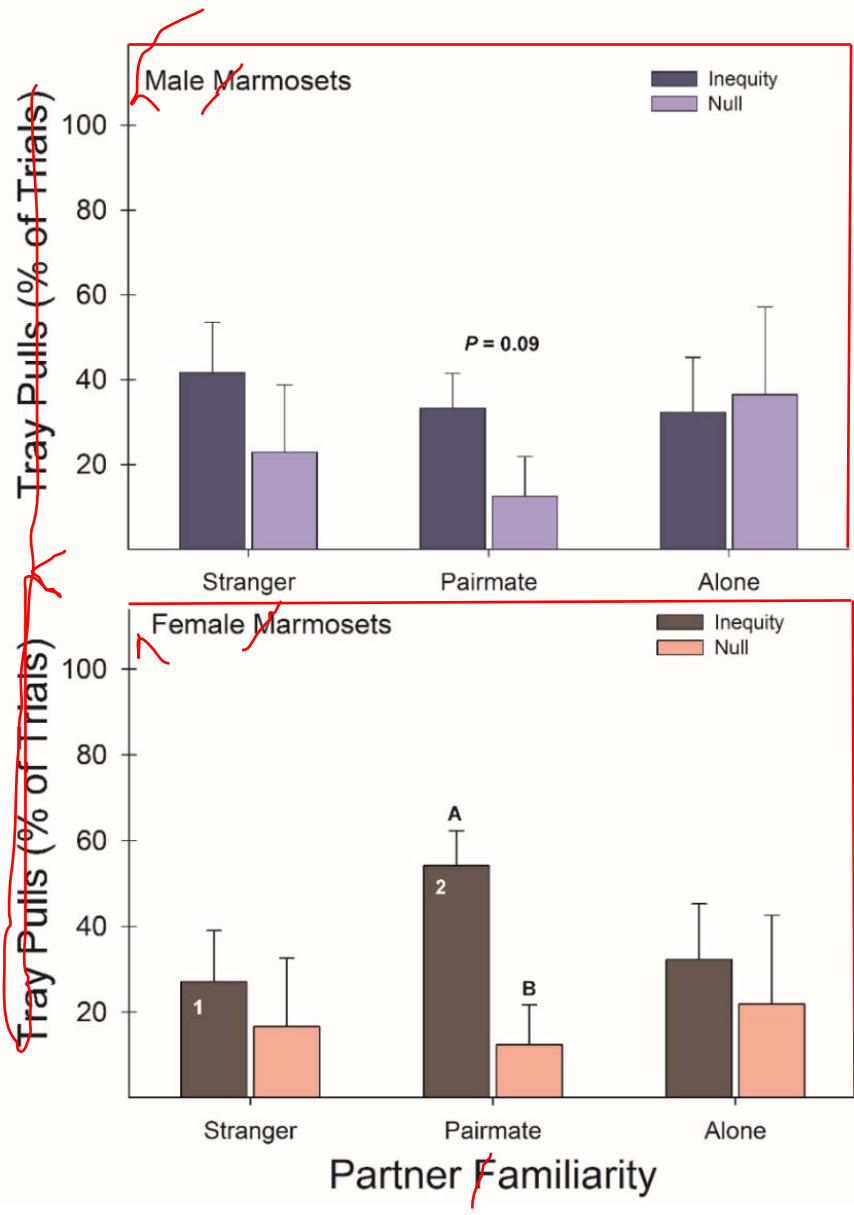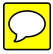

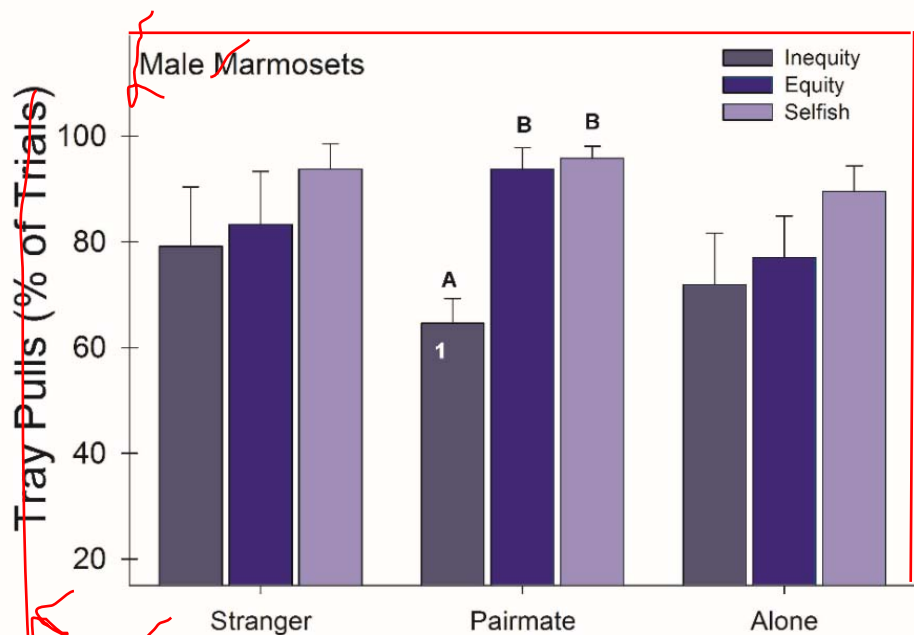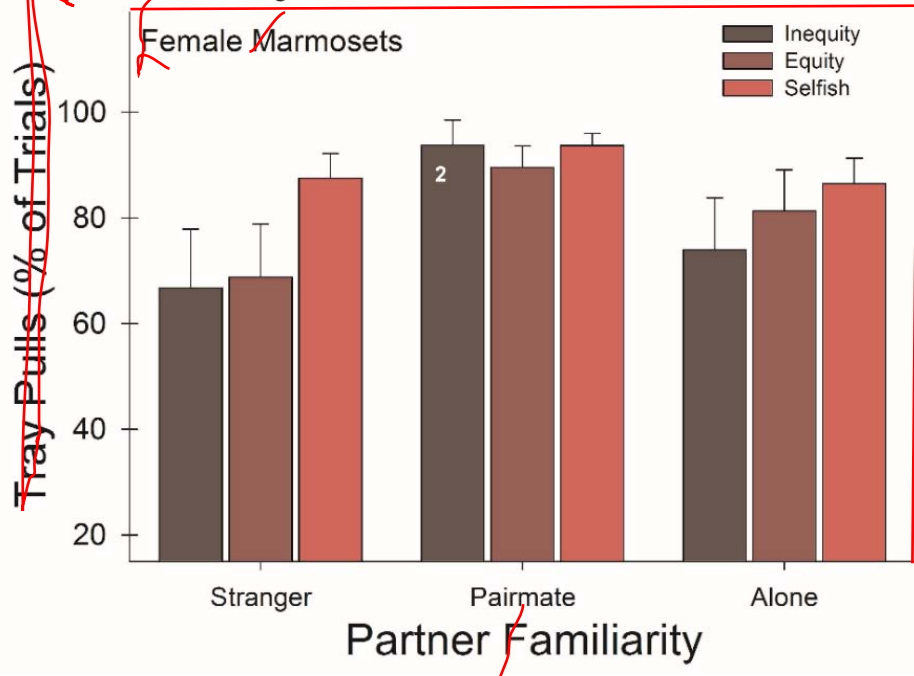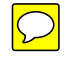

Supplement: NIHMS756650-supplement-1.pdf [file NIHMS756650-supplement-1.pdf]
